# Supplementary material for: Surface-printed microdot array chips for the quantification of axonal collateral branching of a single neuron in vitro
Source: Royal Society of Chemistry journal article supplement (doi:10.1039/c3lc51169c), 2013-11-29
Supplement: c3lc51169c.pdf [file c3lc51169c.pdf]

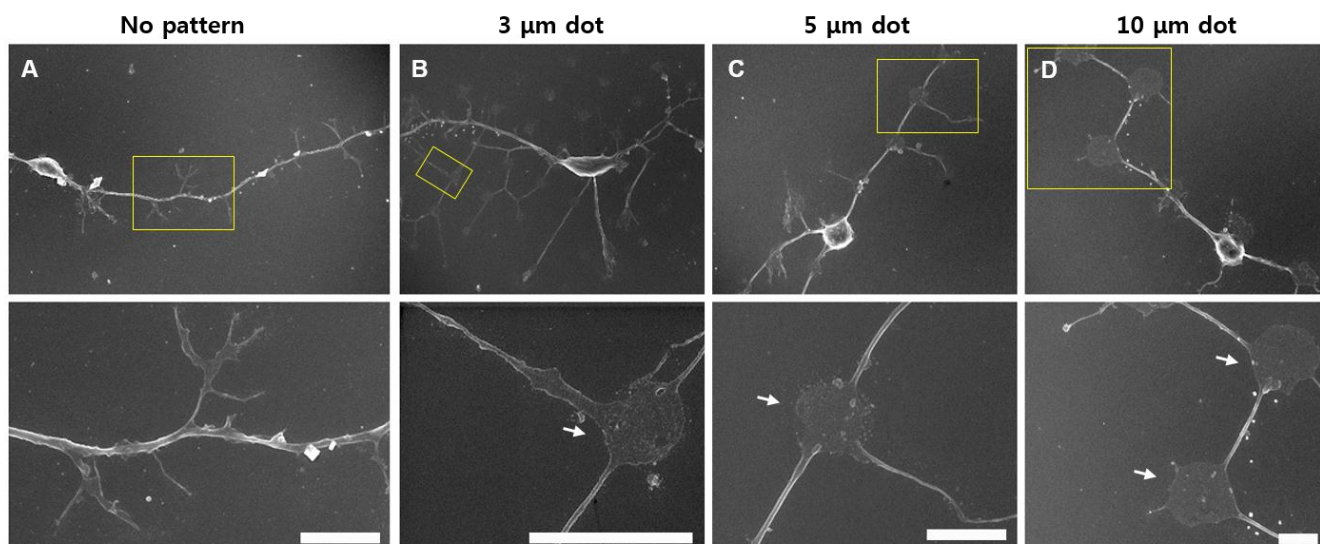

**Supplementary figure 1** SEM images of neurons cultured on unpatterned (A) or dot array-printed substrates with different diameters (B: 3 μm; C: 5 μm; and D: 10 μm) at 2 DIV. Bottom-side images are the magnification of each area (indicated as a yellow rectangle) in top-side images. Scale bars in bottom-side images are 5 μm.
